# Supplementary material
Source: ML conference proceedings conference paper supplement (https://openaccess.thecvf.com/content/ICCV2023/html/Pu_Adaptive_Rotated_Convolution_for_Rotated_Object_Detection_ICCV_2023_paper.html)
Supplement: Supplementary file 1 [file Pu_Adaptive_Rotated_Convolution_for_Rotated_Object_Detection_ICCV_2023_supplemental.pdf]

# Supplementary Material for Adaptive Rotated Convolution for Rotated Object Detection

## 1. Detailed Configurations

We use MMRotate toolbox [9] to produce all the experimental results in the paper, except that Oriented R-CNN [7] is implemented with OBBDetection codebase. The detailed model configurations of each detector are also obtained from these two codebases, and are illustrated in Tab. 1 (for DOTA) and Tab. 2 (for HRSC2016), respectively.

| Method                   | Angle | Batch | LR                   |
|--------------------------|-------|-------|----------------------|
| Rotated RetinaNet [3]    | le90  | 2     | $2.5 \times 10^{-3}$ |
| R3Det [8]                | oc    | 2     | $2.5 \times 10^{-3}$ |
| S <sup>2</sup> ANet [2]  | le135 | 2     | $2.5 \times 10^{-3}$ |
| Rotated Faster R-CNN [5] | le90  | 2     | $5.0 \times 10^{-3}$ |
| CFA [1]                  | le135 | 2     | $8.0 \times 10^{-3}$ |
| Oriented R-CNN [7]       | le90  | 2     | $5.0 \times 10^{-3}$ |

Table 1. Configuration of each detector on **DOTA** [6] dataset. The column *Angle* refers to angle definition, where oc, le90 and le135 denotes opencv definition, long edge 90° definition, and long edge 135° definition, respectively. Besides, the column *Batch* means the batch size, while the column *LR* means and the learning rate.

| Method                  | Angle | Aug | Batch | LR                   |
|-------------------------|-------|-----|-------|----------------------|
| Rotated RetinaNet [3]   | le90  | RR  | 2     | $2.5 \times 10^{-3}$ |
| S <sup>2</sup> ANet [2] | le135 | -   | 2     | $2.5 \times 10^{-3}$ |
| Oriented R-CNN [7]      | le90  | -   | 2     | $5.0 \times 10^{-3}$ |

Table 2. Configuration of each detector on **HRSC2016** [4] dataset. The meaning of column *Angle*, column *Batch* and column *LR* are the same as Tab. 1, while the column *Aug* means data augmentation. In this column, RR means random rotate.

While the detailed training configuration varies among different detectors and different datasets, we restate that the

experiment setting using our proposed backbone networks and that using the baseline backbone networks are kept the same in the experiments for fair comparisons.

## References

- [1] Zonghao Guo, Chang Liu, Xiaosong Zhang, Jianbin Jiao, Xiangyang Ji, and Qixiang Ye. Beyond bounding-box: Convex-hull feature adaptation for oriented and densely packed object detection. In *CVPR*, 2021. 1
- [2] Jiaming Han, Jian Ding, Jie Li, and Gui-Song Xia. Align deep features for oriented object detection. *TGARS*, 2021. 1
- [3] Tsung-Yi Lin, Priya Goyal, Ross Girshick, Kaiming He, and Piotr Dollár. Focal loss for dense object detection. In *CVPR*, 2017. 1
- [4] Zikun Liu, Hongzhen Wang, Lubin Weng, and Yiping Yang. Ship rotated bounding box space for ship extraction from high-resolution optical satellite images with complex backgrounds. *GRSL*, 2016. 1
- [5] Shaoqing Ren, Kaiming He, Ross Girshick, and Jian Sun. Faster r-cnn: Towards real-time object detection with region proposal networks. In *NeurIPS*, 2015. 1
- [6] Gui-Song Xia, Xiang Bai, Jian Ding, Zhen Zhu, Serge Belongie, Jiebo Luo, Mihai Datcu, Marcello Pelillo, and Liangpei Zhang. Dota: A large-scale dataset for object detection in aerial images. In *CVPR*, 2018. 1
- [7] Xingxing Xie, Gong Cheng, Jiabao Wang, Xiwen Yao, and Junwei Han. Oriented r-cnn for object detection. In *ICCV*, 2021. 1
- [8] Xue Yang, Junchi Yan, Ziming Feng, and Tao He. R3det: Refined single-stage detector with feature refinement for rotating object. In *AAAI*, 2021. 1
- [9] Yue Zhou, Xue Yang, Gefan Zhang, Jiabao Wang, Yanyi Liu, Liping Hou, Xue Jiang, Xingzhao Liu, Junchi Yan, Chengqi Lyu, Wenwei Zhang, and Kai Chen. Mmrotate: A rotated object detection benchmark using pytorch. In *ACM MM*, 2022. 1
